# Supplementary material for: Multifunctionality exploration of NiCo2O4–rGO nanocomposites: photochemical water oxidation, methanol electro-oxidation and asymmetric supercapacitor applications
Source: Royal Society of Chemistry journal article supplement (doi:10.1039/d1dt02417e), 2021-01-01
Supplement: d1dt02417e1.pdf [file d1dt02417e1.pdf]

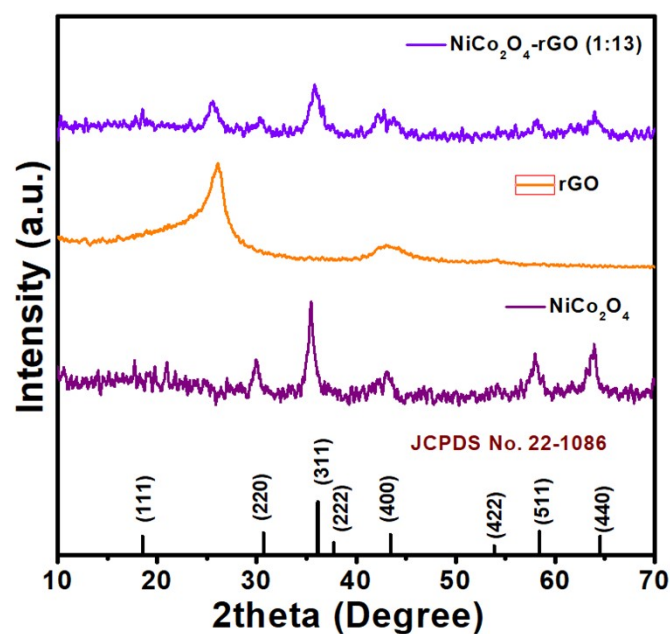

**Fig. S1:** XRD patterns of NiCo<sub>2</sub>O<sub>4</sub>, rGO and composite of NiCo<sub>2</sub>O<sub>4</sub>-rGO (NCO13).

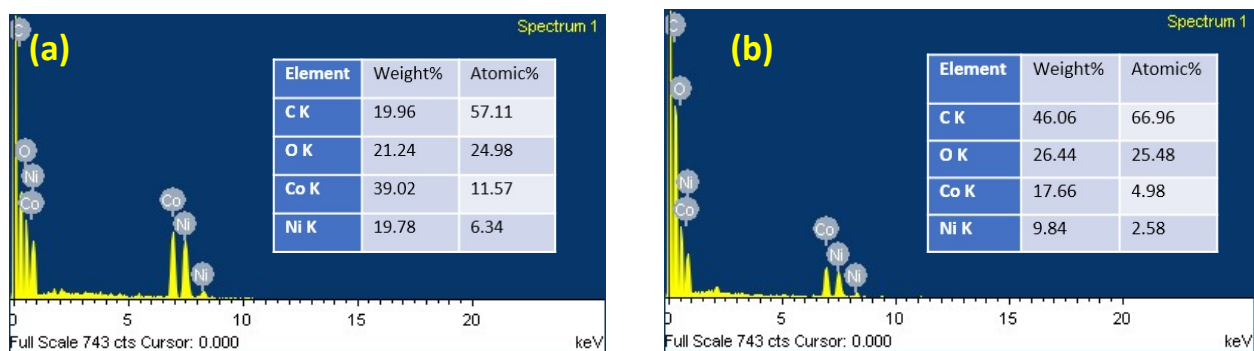

**Fig. S2:** EDS pattern of (a) NCO13 and (b) NCO26.

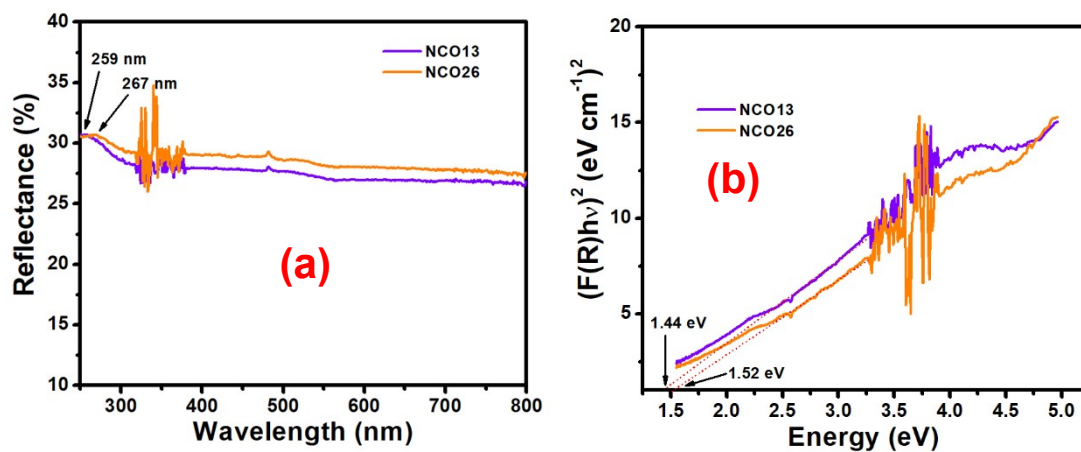

**Fig. S3:** (a) UV-Vis DRS of NCO13 and NCO26, (b) estimation of band gap energy of NCO13 and NCO26.

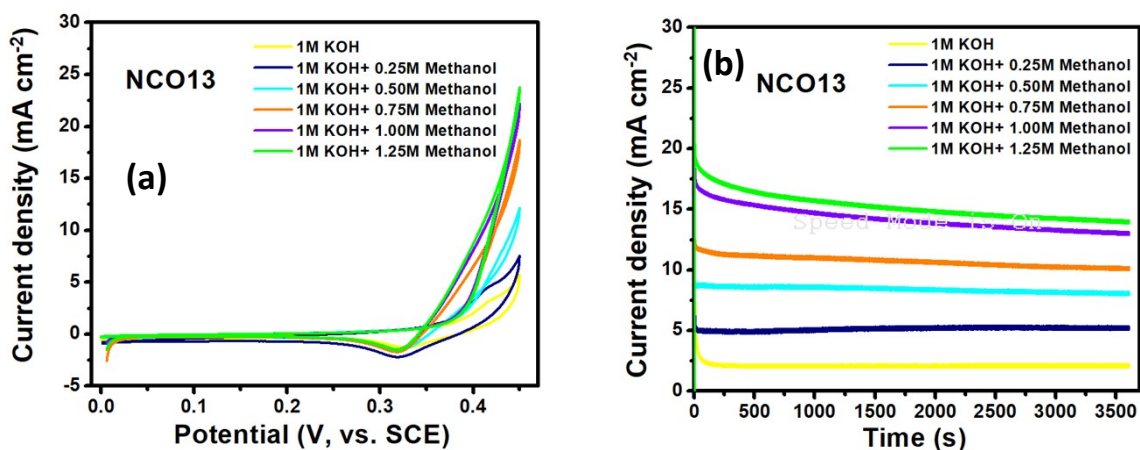

**Fig. S4:** (a) Cyclic voltammograms of NCO13 towards various concentrations of methanol, (b) Chronoamperograms of NCO13 towards various concentrations of methanol.

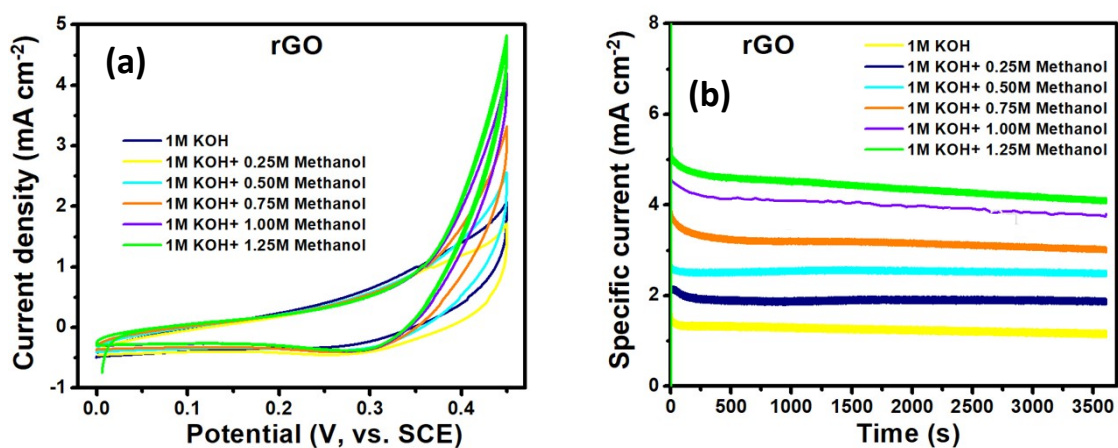

**Fig. S5:** (a) Cyclic voltammograms of pristine rGO towards various concentrations of methanol, (b) Chronoamperograms of pristine rGO towards various concentrations of methanol.

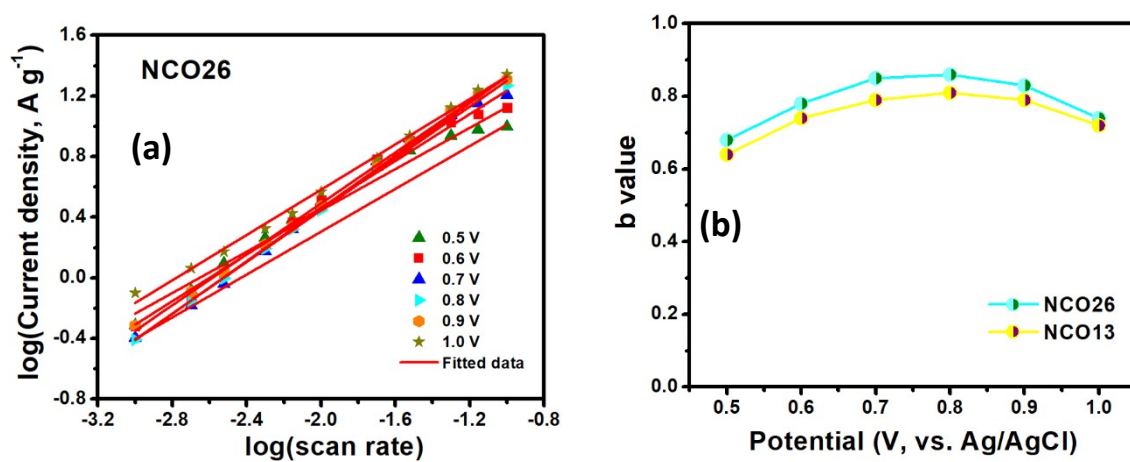

**Fig. S6:** Plot of  $\log(\text{current density})$  vs.  $\log(\text{scan rate})$  for NCO13 (a), plot of  $b$  values at various potentials for NCO13 and NCO26 (b).

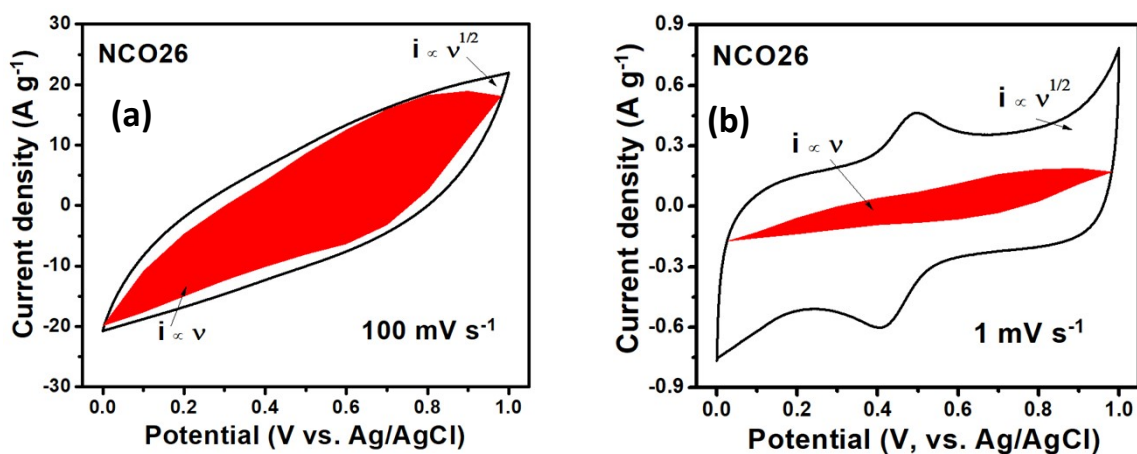

**Fig. S7:** Cyclic voltammograms showing the capacitive and diffusion-controlled contributions for NCO26 at scan rate of (a) 100 mV s<sup>-1</sup>, (b) 1 mV s<sup>-1</sup>.

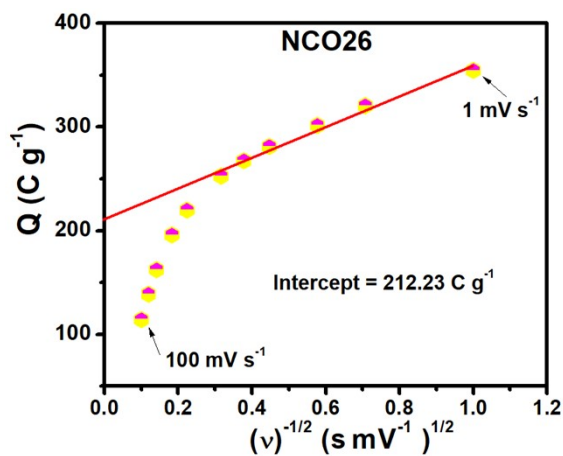

**Fig. S8:** Plot of  $Q$  vs.  $v^{-1/2}$  of NCO 26.

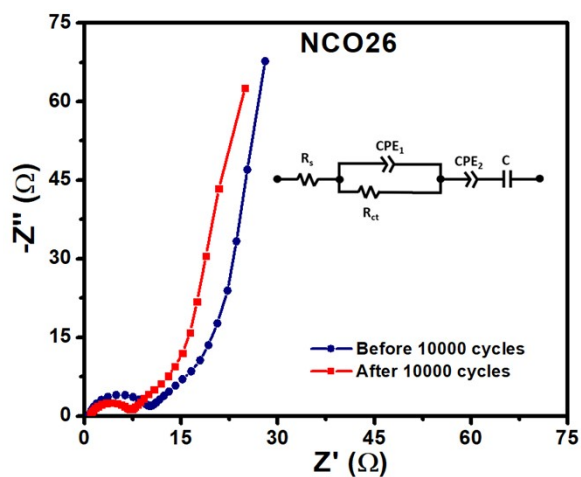

**Fig. S9:** Nyquist plot of NCO26 before and after 10,000 GCD cycles. Inset shows the fitted electrical equivalent circuit.

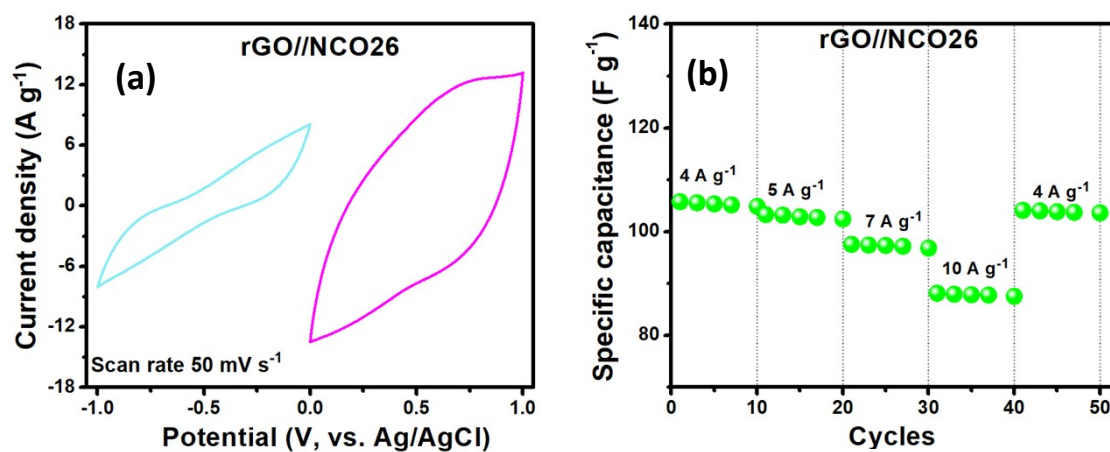

**Fig. S10:** (a) Cyclic voltammograms of rGO and NCO26 in their respective potential windows. (b) Cycling of supercapacitor device at various current densities.
